# Supplementary material for: Macrophage immunomodulation by breast cancer-derived exosomes requires Toll-like receptor 2-mediated activation of NF-κB
Source: PubMed Central journal article supplement — Sci Rep. 2014 Jul 18;4:5750. doi: 10.1038/srep05750 (PMC4102923; doi:10.1038/srep05750), 2014-07-18
Supplement: srep05750-s1.pdf [file srep05750-s1.pdf]

**Macrophage immunomodulation by breast cancer-derived exosomes requires  
Toll-like receptor 2-mediated activation of NF- $\kappa$ B**

Amy Chow<sup>1</sup>, Weiyang Zhou<sup>1,10</sup>, Liang Liu<sup>1,9</sup>, Miranda Y. Fong<sup>1</sup>, Jackson Champer<sup>2,8</sup>, Desiree Van Haute<sup>3,8</sup>, Andrew R. Chin<sup>1,8</sup>, Xiubao Ren<sup>9</sup>, Bogdan Gabriel Gugiu<sup>2,7</sup>, Zhipeng Meng<sup>4</sup>, Wendong Huang<sup>4</sup>, Vu Ngo<sup>5</sup>, Marcin Kortylewski<sup>6</sup>, and Shizhen Emily Wang<sup>1</sup>

## Supplementary Figures and Figure Legends

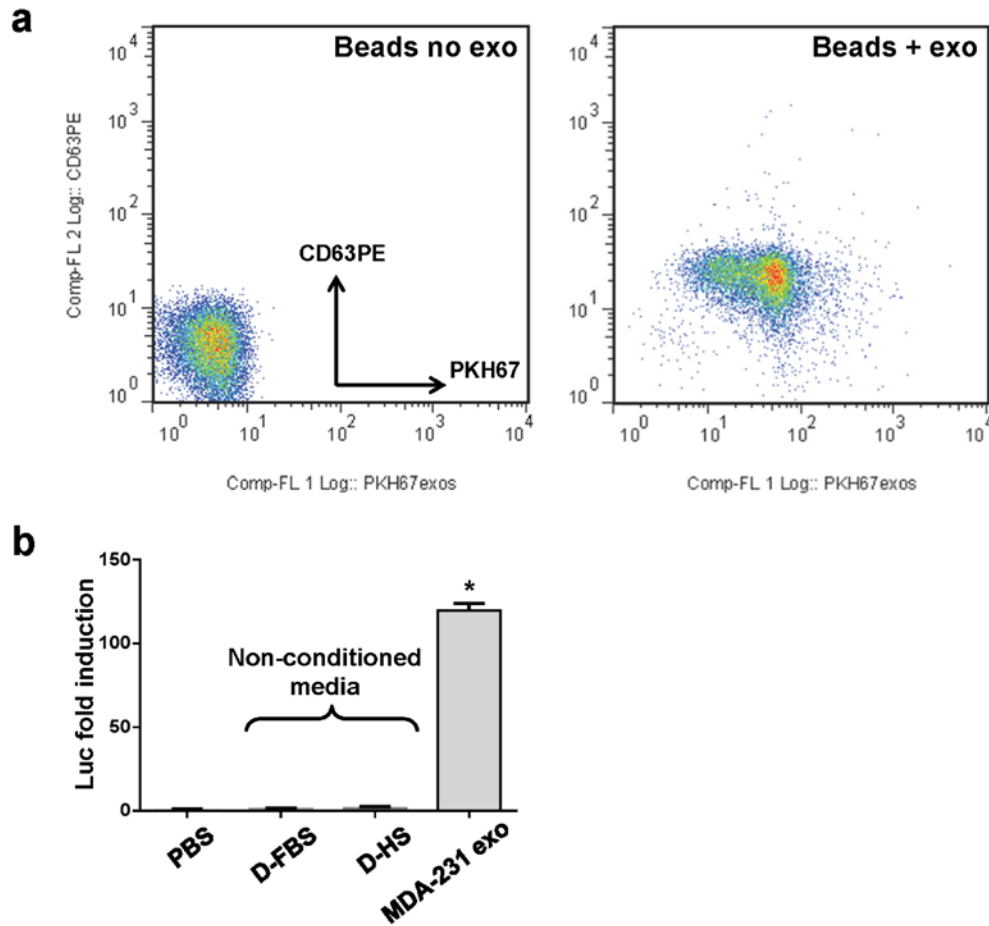

**Supplementary Fig. S1** On-bead flow cytometry analysis of exosomes and effect of non-conditioned media on NF- $\kappa$ B activity. **(a)** Exosomes were prepared from MDA-231 conditioned media, fluorescently labeled with PKH67, and adsorbed to polymer microspheres. Anti-CD63PE was used to stain adsorbed exosomes prior to flow cytometric analysis. **(b)** The exosome purification protocol was carried out for non-conditioned MDA-231 and MCF10A media (containing and indicated as exosome-depleted fetal bovine serum/D-FBS and horse serum/D-HS, respectively) and used to treat RawkB cells. Luciferase induction was compared to that obtained by treatment with MDA-231 exosomes. \* $p < 0.001$  compared to the PBS (control) group.

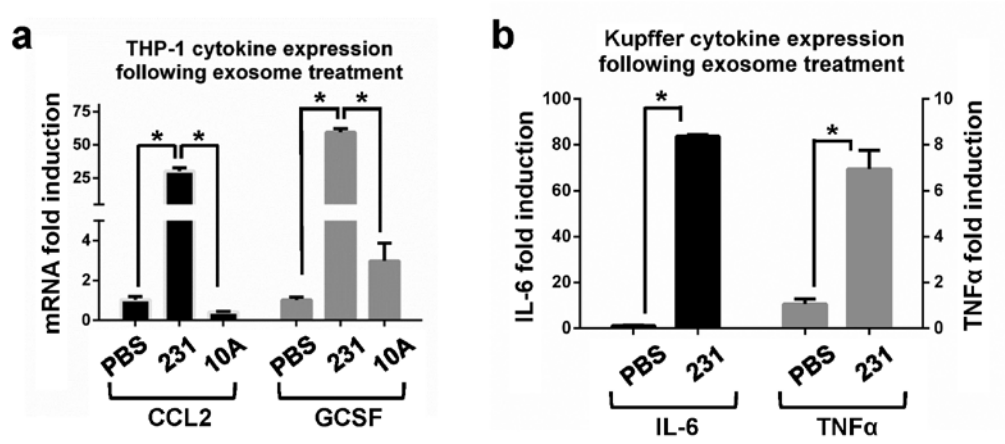

**Supplementary Fig. S2** Effects of cancer-derived exosomes on cytokine expression in THP-1 cells and Kupffer cells. Following administration of exosomes derived from indicated cell types, quantitative RT-PCR was used to assess expression of CCL2 and GCSF in THP-1 cells (**a**) and expression of IL-6 and TNFα in Kupffer cells (**b**). \* $p < 0.001$ .

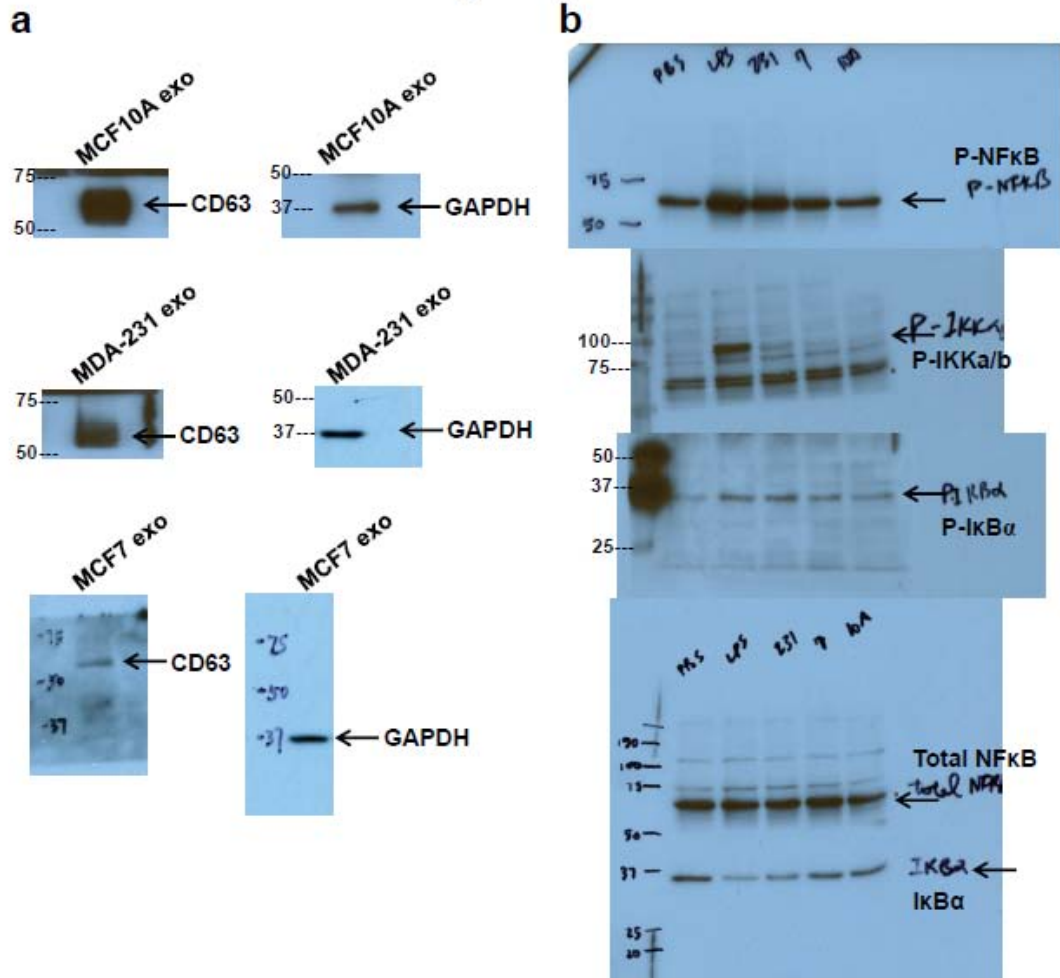

**Supplementary Fig. S3** Full-length immunoblots for Fig. 1b (a) and Fig. 1e (b). Numbers to the left indicate the positions of size markers (in kDa) and the arrows indicate the band of interest.

## Supplementary Table

**Supplementary Table S1** Palmitoylated proteins identified in MDA-MB-231 and MCF10A cells

| Gene name | Protein identity                                                                                                 | Number of identified peptides |         |         |         |
|-----------|------------------------------------------------------------------------------------------------------------------|-------------------------------|---------|---------|---------|
|           |                                                                                                                  | 231 HA+                       | 231 HA- | 10A HA+ | 10A HA- |
| CD44      | CD44 antigen                                                                                                     | 72                            | 0       | 28      | 0       |
| SNAP23    | Synaptosomal-associated protein 23                                                                               | 17                            | 0       | 16      | 0       |
| LAMTOR1   | Ragulator complex protein LAMTOR1                                                                                | 13                            | 0       | 18      | 0       |
| RAP2B     | Ras-related protein Rap-2b                                                                                       | 7                             | 0       | 8       | 0       |
| CAV1      | Caveolin-1                                                                                                       | 6                             | 0       | 16      | 0       |
| TFRC      | Transferrin receptor protein 1                                                                                   | 5                             | 0       | 0       | 0       |
| IFITM3    | Interferon-induced transmembrane protein 3                                                                       | 5                             | 0       | 0       | 0       |
| NRAS      | GTPase Nras                                                                                                      | 4                             | 0       | 1       | 0       |
| BST2      | Bone marrow stromal antigen 2                                                                                    | 4                             | 0       | 0       | 0       |
| CYB5B     | Cytochrome b5 type B                                                                                             | 4                             | 0       | 0       | 0       |
| CD81      | CD81 antigen                                                                                                     | 3                             | 0       | 2       | 0       |
| UBB       | Polyubiquitin-B                                                                                                  | 3                             | 2       | 2       | 0       |
| CKAP4     | Cytoskeleton-associated protein 4                                                                                | 3                             | 0       | 0       | 0       |
| TMX1      | Thioredoxin-related transmembrane protein 1                                                                      | 2                             | 0       | 1       | 0       |
| THBD      | Thrombomodulin                                                                                                   | 2                             | 0       | 0       | 0       |
| PAG1      | Phosphoprotein associated with glycosphingolipid-enriched microdomains 1                                         | 2                             | 0       | 0       | 0       |
| S100A14   | Protein S100-A14                                                                                                 | 0                             | 0       | 81      | 3       |
| MUC1      | Mucin-1                                                                                                          | 0                             | 0       | 14      | 0       |
| DLST      | Dihydrolipoyllysine-residue succinyltransferase component of 2-oxoglutarate dehydrogenase complex, mitochondrial | 0                             | 0       | 4       | 0       |
